# Supplementary material
Source: PubMed Central journal article supplement (PMC5621928)
Supplement: jciinsight-2-95072-s001.pdf [file jciinsight-2-95072-s001.pdf]

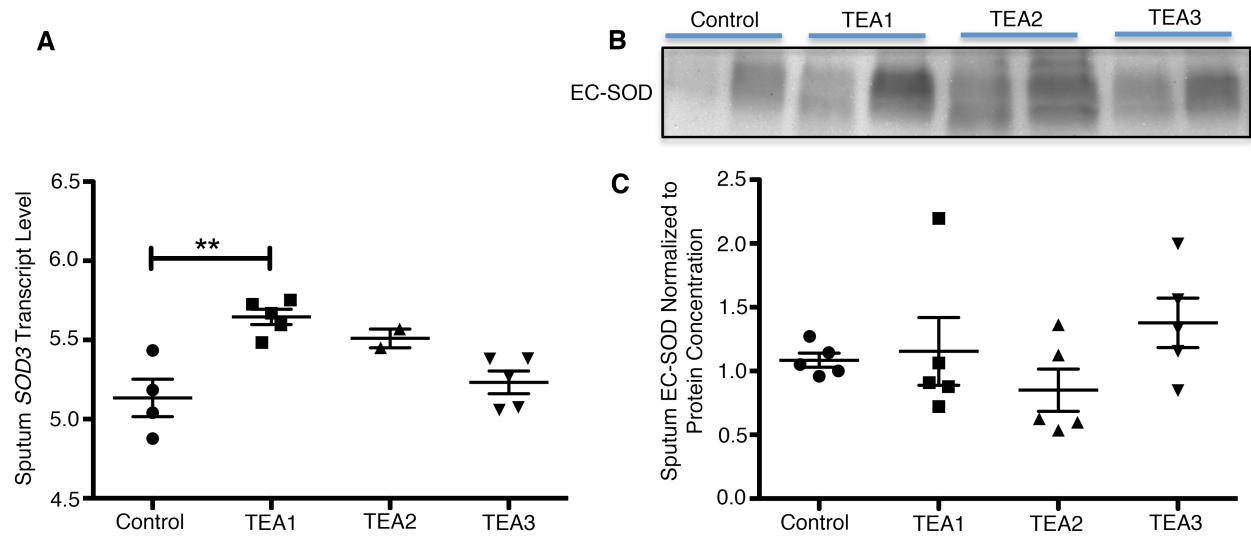

### Supplemental Figure 1

**Unlike *SOD3* transcript, EC-SOD protein level does not change in the asthmatic sputum.**

(A) *SOD3* mRNA transcript of the same samples used in western blot. Western blot bands (B) and densitometry (C) showing EC-SOD variation among subjects. N = 5/group (\*\*p<0.01). One-way ANOVA was used to determine the statistical significance with Tukey's multiple comparison test. Error bars represent ±SEM.

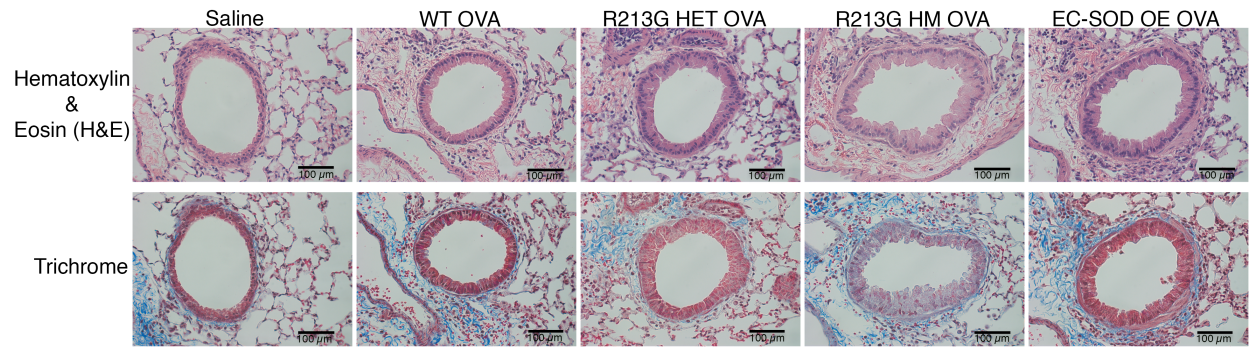

## Supplemental Figure 2

**Acute allergic airway inflammation ovalbumin model in C57BL/6 does not change collagen deposition in lungs.** 20x magnification of lung sections stained with H&E and Trichrome from saline, WT OVA, R213G HET OVA, R213G HM OVA and EC-SOD OE OVA mice. Scales are shown in the panels (100 μm).

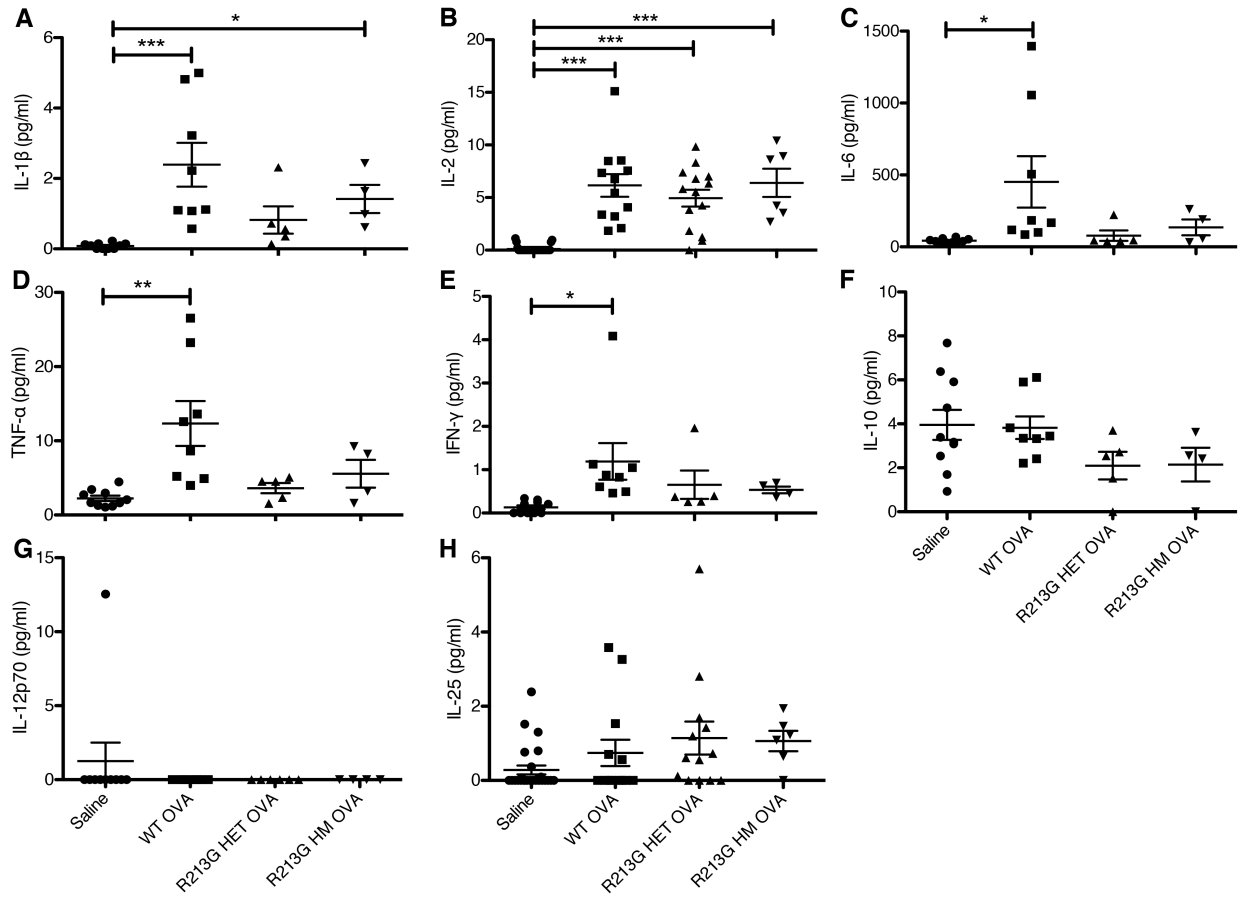

### Supplemental Figure 3

#### **R213G protects mice from OVA-induced increase in inflammatory cytokines (A-H).**

Changes in IL-1 $\beta$  (A), IL-2 (B), IL-6 (C), TNF- $\alpha$  (D), IFN- $\gamma$  (E), IL-10 (F) and IL-12p70 (G) IL-25 (H) with OVA. Saline = 9-20, WT OVA = 8-12, R213G HET OVA = 5-14, R213G HM OVA = 4-6. Statistical significance was determined by One-way ANOVA with Tukey's multiple comparison test. Error bars represent  $\pm$ SEM. \* $p$ <0.05, \*\* $p$ <0.01, \*\*\*0.001.

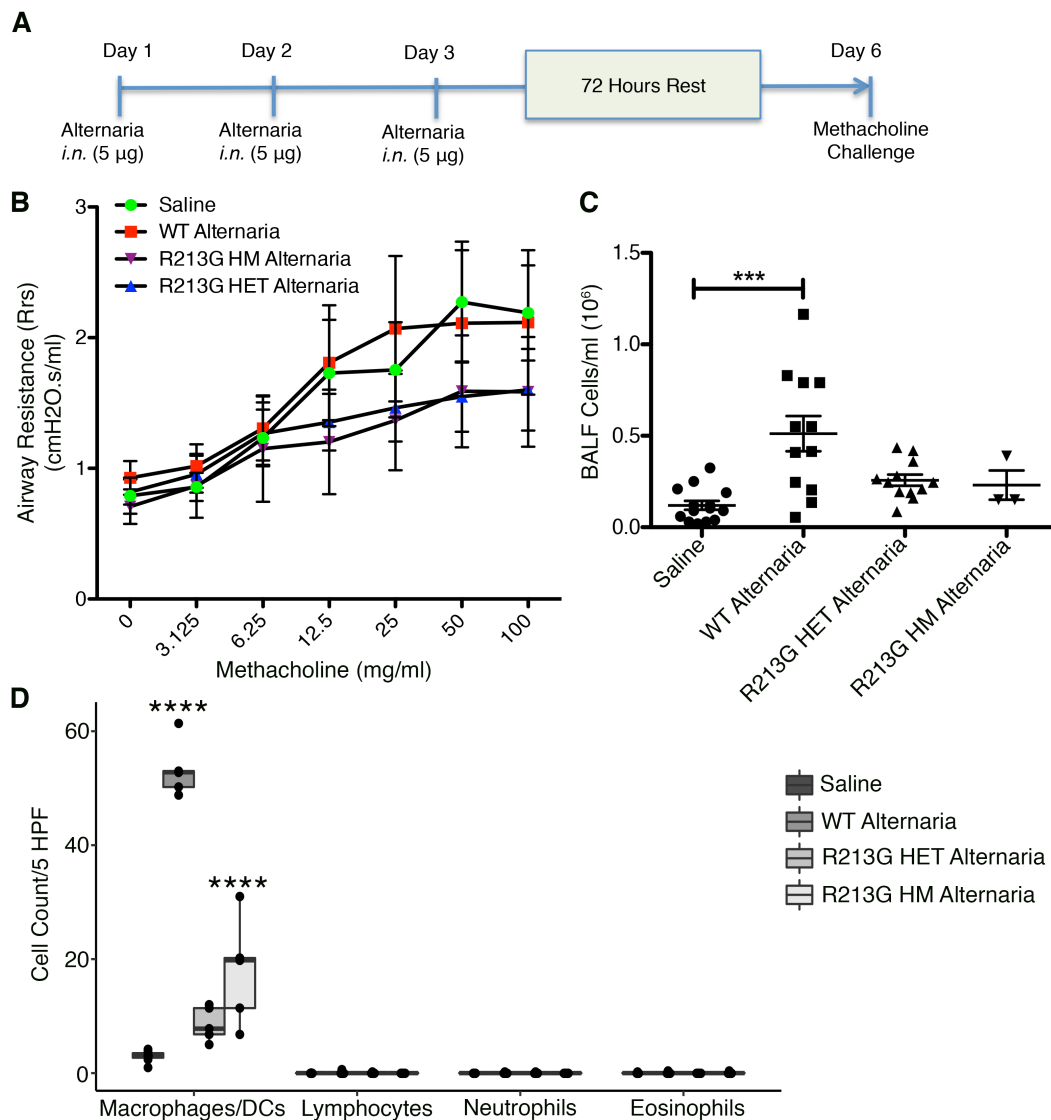

### Supplemental Figure 4

**R213G protects mice from *Alternaria*-induced inflammatory cell infiltration in an innate model of allergic airway inflammation.** (A) Flow chart showing the *Alternaria* exposure protocol. (B) Airway resistance measured as Rrs with flexiVent FX (flexiWare software) at different doses of Methacholine (0 to 100 mg/ml). Inflammatory cell infiltration was measured as total BALF cell count (C) and cell differentials as shown in Supplemental Figure 5D. One-way or Two-way ANOVA was used with Tukey's or Bonferroni multiple comparisons, respectively.

Saline = 12, WT *Alternaria* = 12, R213G HET *Alternaria* = 12, R213G HM *Alternaria* = 4

(\*\*\* $p < 0.001$ , \*\*\*\* $p < 0.0001$ , compared to saline). Error bars represent  $\pm$ SEM.

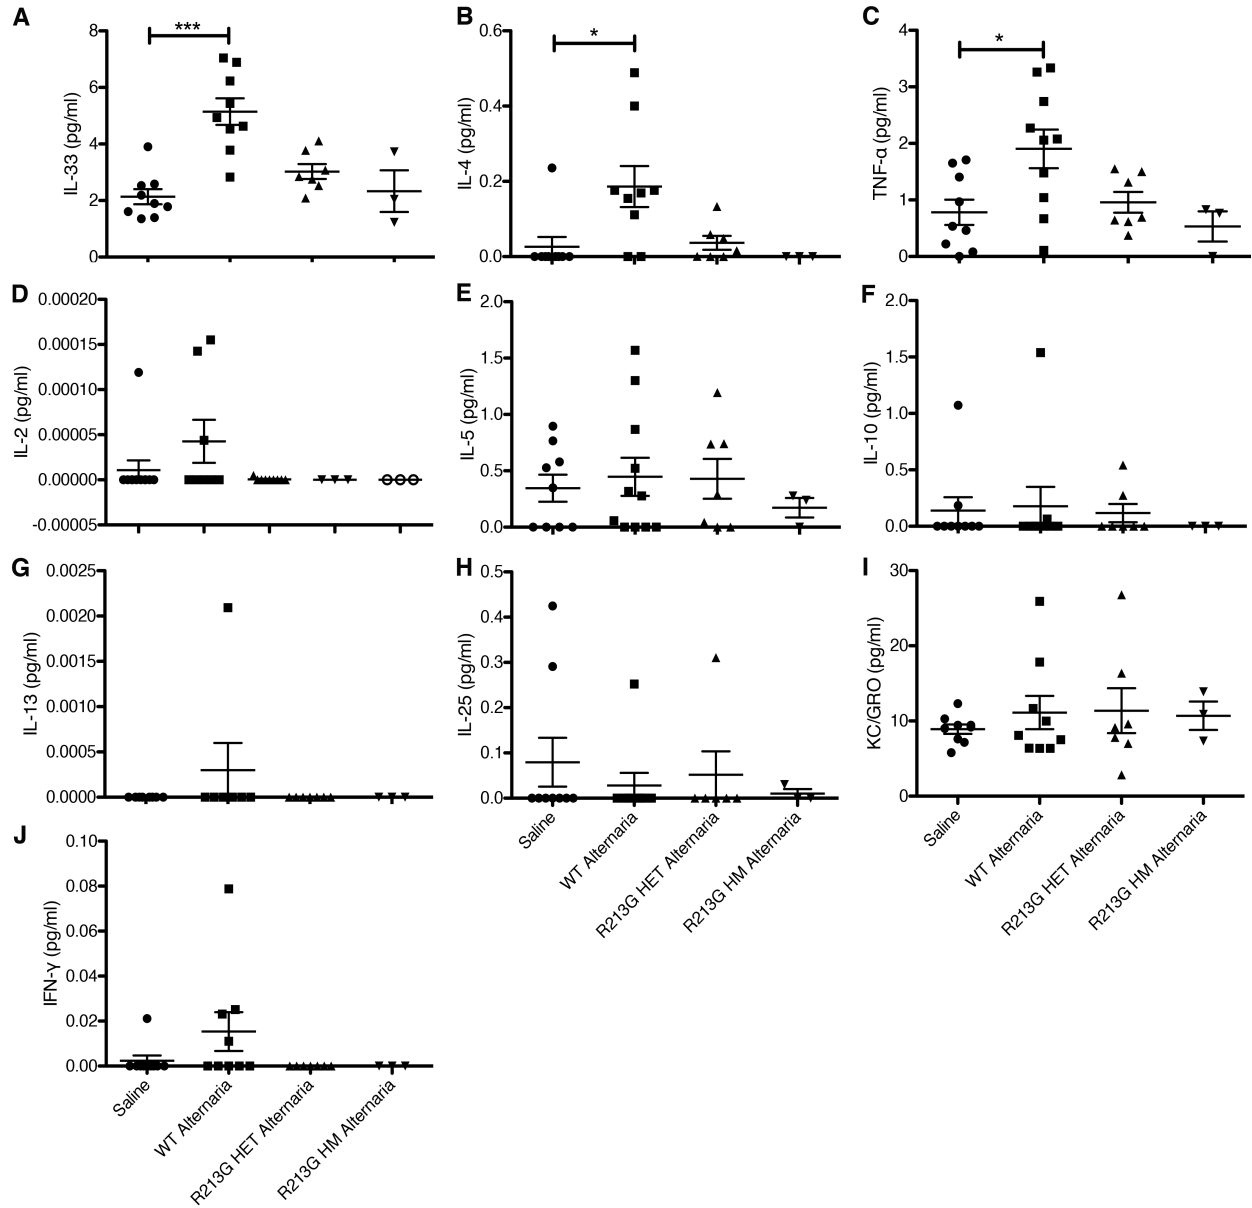

### Supplemental Figure 5

**R213G protects mice from *Alternaria*-induced inflammatory cytokines in an innate model of allergic airway inflammation. (A-J).** Changes in IL-33 (A), IL-4 (B), TNF- $\alpha$  (C), IL-2 (D), IL-5 (E), IL-10 (F), IL-13 (G) IL-25 (H), KC/GRO (I), IFN- $\gamma$  (J) with OVA. Saline = 9, WT Alternaria = 9, R213G HET Alternaria = 8, R213G HM Alternaria = 3. Statistical significance was determined by One-way ANOVA with Tukey's multiple comparison test. Error bars represent  $\pm$ SEM. \* $p < 0.05$ , \*\* $p < 0.01$ , \*\*\* $p < 0.001$

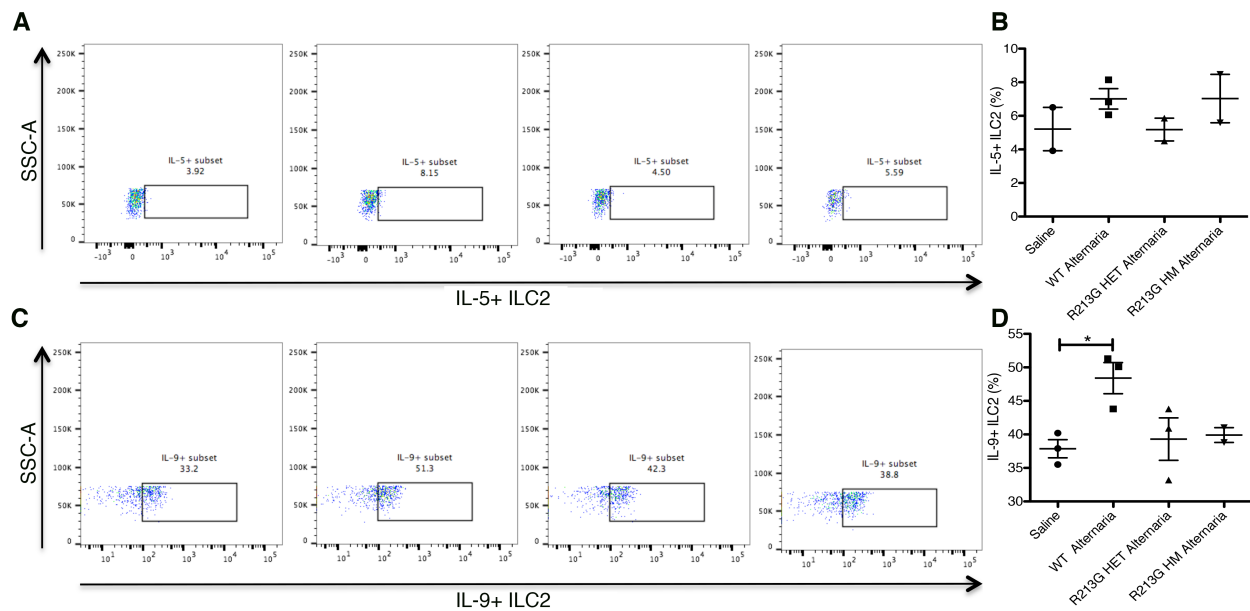

### Supplemental Figure 6

**R213G reduces *Alternaria*-induced IL-9<sup>+</sup> ILC2 in mouse lungs.** Histograms showing: (A) IL5<sup>+</sup> ILC2 (Lin<sup>-</sup> (CD3, Ly-6G/Ly-6C, CD11b, CD45R/B220, TER-119) /CD5<sup>-</sup>/ CD49b<sup>-</sup>/ TCRαβ<sup>-</sup>/ TCRγδ<sup>-</sup>/CD45<sup>+</sup>/CD90<sup>+</sup>/ST2<sup>+</sup> or GATA<sup>+</sup>/IL-5<sup>+</sup>) and (C) IL9<sup>+</sup> ILC2 (Lin<sup>-</sup> (CD3, Ly-6G/Ly-6C, CD11b, CD45R/B220, TER-119) /CD5<sup>-</sup>/ CD49b<sup>-</sup>/ TCRαβ<sup>-</sup>/ TCRγδ<sup>-</sup>/CD45<sup>+</sup>/CD90<sup>+</sup>/ST2<sup>+</sup> or GATA<sup>+</sup>/IL-9<sup>+</sup>) in different groups. Analysis of IL-5<sup>+</sup> or IL-9<sup>+</sup> ILC2 cell percent is shown in Supplemental Figures 7B and 7C, respectively. One-way ANOVA was used with Tukey's multiple comparison test. Error bars represent ±SEM. (N = 2-3/group) \*p<0.05.

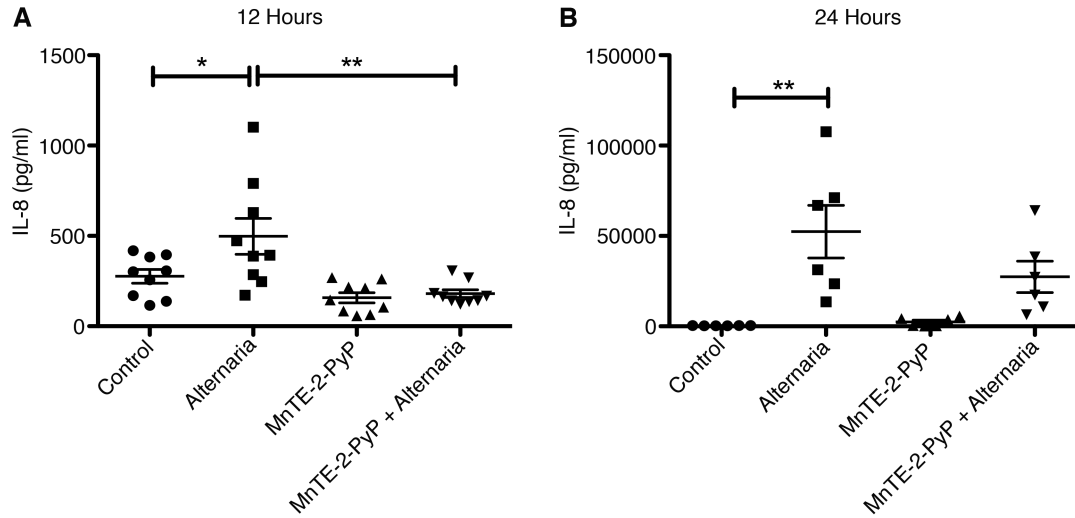

### Supplemental Figure 7

**SOD mimetic reduces *Alternaria*-induced IL-8 secretion from BEAS2B cells.** IL-8 secretion (pg/ml) was measured in the cell culture supernatant in 12 hours, N = 9/group (**A**) and 24 hours, N = 6/group (**B**). Data was generated with 4 different BEAS2B cell passages in 3 independent experiments for 12-hour time point and 3 different cell passages in 3 independent experiments for 24-hour time point. One-way ANOVA was used with Tukey's multiple comparison test. Error bars represent  $\pm$ SEM. \* $p < 0.05$ , \*\* $p < 0.01$ .



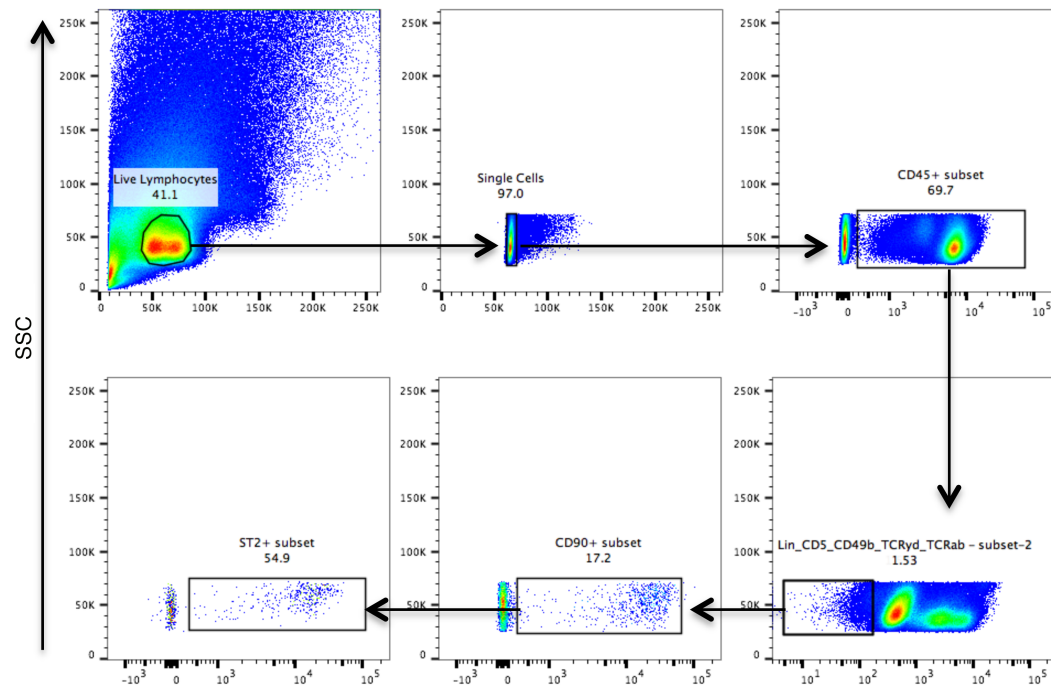

### Supplemental Figure 8

Gating strategy for ILC2. Scatter plot showing gating strategy to identify ILC2 in mouse lungs.

**Supplemental Table 1: Antibodies used in Flowcytometry and Western Blot**

| <b>Antibodies Used</b> |                                                                    |                  |                |              |              |
|------------------------|--------------------------------------------------------------------|------------------|----------------|--------------|--------------|
| <b>#</b>               | <b>Marker</b>                                                      | <b>Catalog #</b> | <b>Company</b> | <b>Clone</b> | <b>Lot #</b> |
| 1                      | CD45.2                                                             | 109806           | Biolegend      | 104          | B197974      |
| 2                      | Lineage Cocktail<br>(CD3, Ly-6G/Ly-6C, CD11b, CD45R/B220, TER-119) | 133310           | Biolegend      | -            | B205956      |
| 3                      | CD5                                                                | 48-0051-82       | eBioscience    | 53-7.3       | 4276917      |
| 4                      | CD49b                                                              | 108918           | Biolegend      | DX5          | B211449      |
| 5                      | TCR $\alpha\beta$                                                  | 127816           | Biolegend      | B20.1        | B194511      |
| 6                      | TCR $\gamma\delta$                                                 | 48-5711-82       | eBioscience    | eBioGL3      | 4283584      |
| 7                      | CD25                                                               | 45-0251-82       | eBioscience    | PC61.5       | E08322-1634  |
| 8                      | CD90                                                               | FAB7335N         | Novus          | A700         | 1449095      |
| 9                      | ST2 (IL-33R)                                                       | 101001PE         | mdbiosciences  | DJ8          | 526410       |
| 10                     | GATA-3                                                             | 46-9966-42       | eBioscience    | TWAJ         | 4288749      |
| 11                     | IL-5                                                               | 504306           | Biolegend      | TRFK5        | B2009977     |
| 12                     | IL-13                                                              | NBP1-43239UV     | Novus          | 13A          | 4274531      |
| 13                     | IL-9                                                               | 514106           | Biolegend      | RM9A4        | B201623      |
| 14                     | CD16/32                                                            | 101302           | Biolegend      | 93           | B211222      |
| 15                     | MUC5AC                                                             | MA1-38223        | Thermo Fisher  | 45M1         | RD2184141    |
| 16                     | IL-33                                                              | MAB3626          | R&D Systems    | 396118       | GR22767-17   |
| 17                     | $\beta$ -Actin                                                     | 4967S            | Sigma-Aldrich  | -            | 7            |
| 18                     | Mouse HRP                                                          | HAF007           | Novus          | -            | FIM2916021   |
| 19                     | Rabbit HRP                                                         | HAF008           | Novus          | -            | FIN1715091   |
| 20                     | EC-SOD (56)                                                        | Made for NJH     | Lampire        | -            | -            |
